# Supplementary figures and images for: Integrated Metabolomics, Transcriptome and Functional Analysis Reveal Key Genes Are Involved in Tree Age-Induced Amino Acid Accumulation in Torreya grandis Nuts
Source: MDPI journal article supplement (doi:10.3390/ijms242317025), 2023-12-01

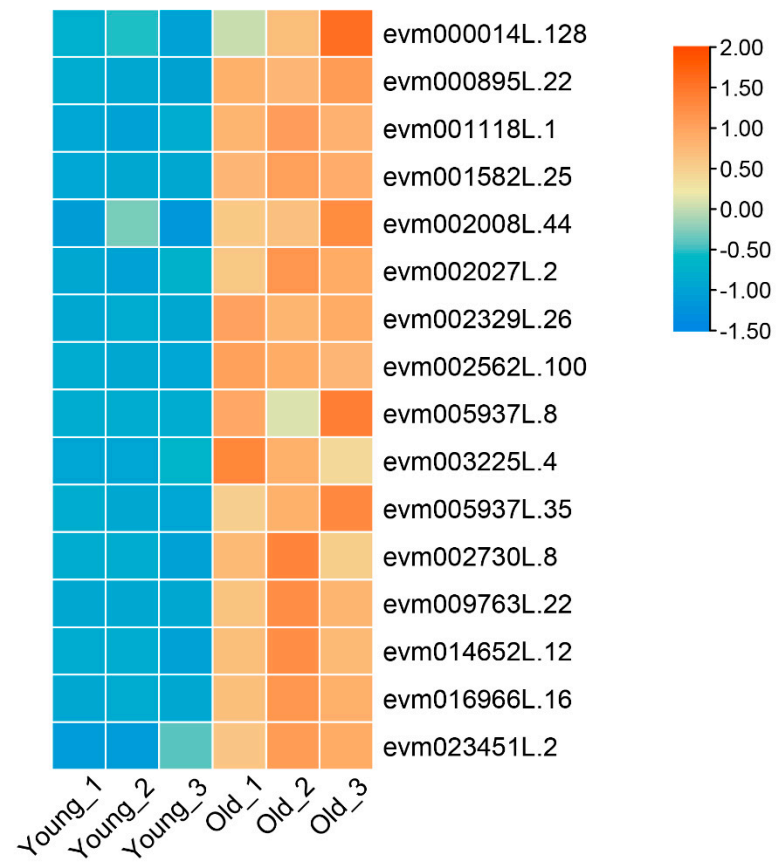

**Figure S1. A heatmap of DEGs related to the biosynthesis of key amino acids.**

Supplement: s1 [file s1]
